# Supplementary material
Source: PubMed Central journal article supplement (PMC3811438)
Supplement: AAC.00897-13_zac010132214so1.pdf [file AAC.00897-13_zac010132214so1.pdf]

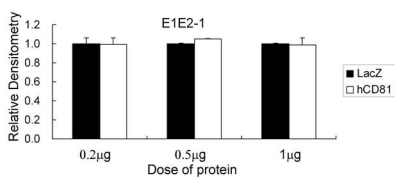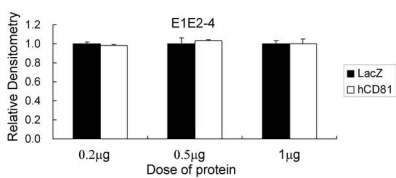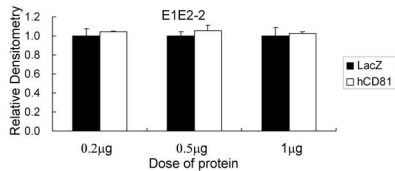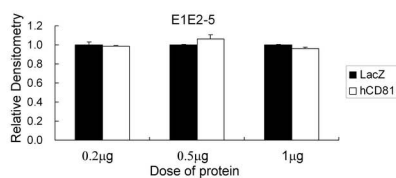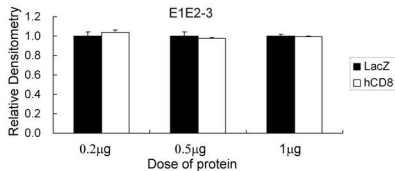

Relative HBV DNA level

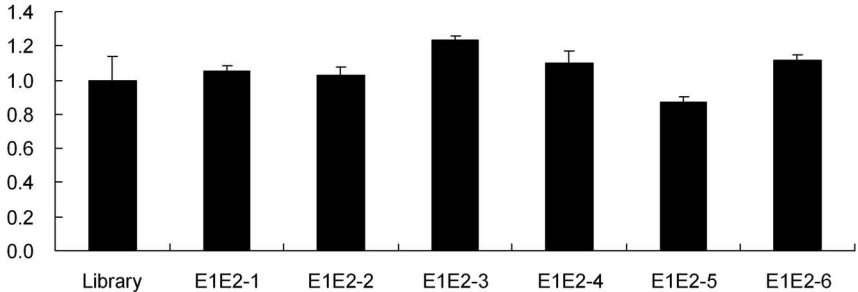

**A**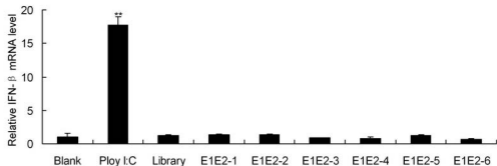**B**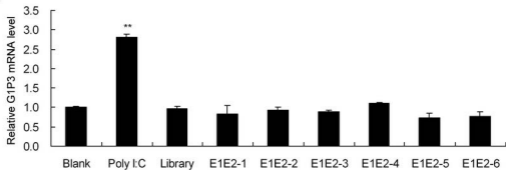**C**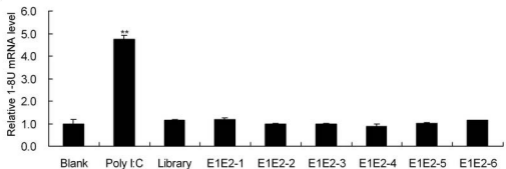

## SUPPLEMENTAL MATERIAL LEGENDS

**Figure S1. Aptamer E1E2-1, E1E2-2, E1E2-3, E1E2-4, E1E2-5 and human CD81 protein do not share the similar binding sites on HCV E1E2 protein.** Fixed concentration of each aptamer was incubated with fixed concentration of E1E2 protein and increasing concentrations of human CD81 protein. Control protein LacZ was used as a control. ELONA assay was performed. The data were obtained as described in Figure 2A and represented the means of 3 different experiments.

**Figure S2. Aptamers do not affect hepatitis B viral DNA replication.** HepG2.2.15 cells derived from HepG2 cells transfected with full genome of HBV were inoculated with aptamers for 48 hours. Intracellular HBV DNA was detected with real-time PCR and normalized with GAPDH.

**Figure S3. E1E2 aptamers do not induce innate immune response in naïve human hepatocytes.** E1E2 aptamers do not induce IFN- $\beta$  (A), G1P3 (B) and 18U (C) in naïve human hepatocytes. Huh7.5 cells were treated with 100nM of library and aptamers. Poly I:C was transfected into Huh7.5 cells. Twenty-four hours later, total cellular RNA was isolated. The expression of IFN- $\beta$ , G1P3 and 18U was detected by real-time PCR and normalized with GAPDH. Poly I:C and blank control were used as positive and negative control respectively. The data represented the means of three different experiments. Error bars represent mean  $\pm$  S.D. **\*\* $P$ <0.01** verse blank control.
